# Supplementary material for: Early Colorectal Responses to HIV-1 and Modulation by Antiretroviral Drugs
Source: MDPI journal article supplement (doi:10.3390/vaccines9030231), 2021-03-08
Supplement: s1 [file s1]

**Table S3.** List of significantly modulated cytokines by dosing with ARVs and HIV-1 infection of colorectal explants<sup>1</sup>.

NL4.3 ± ARV, 6 h post-treatment

| Cytokine | Treatment <sup>1</sup> |           |           |           |             |           |               |           |             |           |              |           |              |           |
|----------|------------------------|-----------|-----------|-----------|-------------|-----------|---------------|-----------|-------------|-----------|--------------|-----------|--------------|-----------|
|          | Virus                  |           | TFV 35 µM |           | UC781 12 µM |           | TMC120 1.2 µM |           | T1249 10 µM |           | AMD3465 5 µM |           | CMPD167 5 µM |           |
|          | FC                     | <i>P</i>  | FC        | <i>P</i>  | FC          | <i>P</i>  | FC            | <i>P</i>  | FC          | <i>P</i>  | FC           | <i>P</i>  | FC           | <i>P</i>  |
| IL-8     | 4.165                  | 0.0564070 | 1.612     | 0.0179589 | 2.915       | 0.0060963 | 2.431         | 0.0001251 | 2.345       | 0.0671596 | 2.324        | 0.0010492 | 2.068        | 0.0007800 |
| MCP-1    | 2.925                  | 0.0612790 | 2.074     | 0.0157406 | 2.921       | 0.0127667 | 2.659         | 0.0294708 | 2.214       | 0.0558412 | 2.054        | 0.0350007 | 2.068        | 0.0316410 |
| IL-6     | 1.103                  | 0.8664470 | 0.855     | 0.7959987 | 1.088       | 0.8766056 | 0.983         | 0.9765724 | 0.897       | 0.8558390 | 0.834        | 0.7692537 | 0.893        | 0.8496004 |
| GCSF     | 1.308                  | 0.2485120 | 2.195     | 0.0004054 | 2.339       | 0.0002530 | 2.318         | 0.0003237 | 2.288       | 0.0004008 | 2.258        | 0.0003732 | 2.260        | 0.0003187 |
| IL-1α    | 7.603                  | 0.0002500 | 0.050     | 0.0014505 | 0.057       | 0.0015074 | 0.056         | 0.0015054 | 0.053       | 0.0014795 | 0.057        | 0.0015067 | 0.052        | 0.0014672 |
| IP-10    | 12.937                 | 0.0064490 | 35.688    | 0.0142703 | 67.598      | 0.0121893 | 54.921        | 0.0112898 | 34.320      | 0.0066698 | 27.174       | 0.0703082 | 24.470       | 0.0041638 |
| IL-1β    | 1.964                  | 0.0154460 | 0.763     | 0.1727533 | 0.905       | 0.5686441 | 1.014         | 0.9390240 | 0.917       | 0.6307745 | 1.145        | 0.4827313 | 0.861        | 0.4442053 |
| IL-16    | 1.516                  | 0.1731740 | 0.239     | 0.0197161 | 1.065       | 0.8862978 | 1.272         | 0.5864865 | 0.664       | 0.2402865 | 0.825        | 0.6211252 | 0.575        | 0.2146643 |
| GMCSF    | 3.243                  | 0.0050290 | 2.118     | 0.0641755 | 3.092       | 0.0168952 | 2.521         | 0.0117180 | 2.570       | 0.0121415 | 2.555        | 0.0144093 | 1.879        | 0.0940835 |
| IL-4     | 1.092                  | 0.0791320 | 1.025     | 0.7217409 | 1.043       | 0.7619075 | 1.072         | 0.2893904 | 0.960       | 0.7052923 | 1.011        | 0.9488090 | 0.889        | 0.3324874 |
| IL-2     | 1.249                  | 0.0025830 | 0.357     | 0.0000035 | 0.473       | 0.0005497 | 0.425         | 0.0000059 | 0.352       | 0.0000020 | 0.500        | 0.0006667 | 0.326        | 0.0000040 |
| TGF-β    | 3.146                  | 0.0031510 | 33.127    | 0.0000066 | 40.018      | 0.0000249 | 36.653        | 0.0000000 | 33.194      | 0.0000031 | 39.707       | 0.0000303 | 31.994       | 0.0000004 |
| RANTES   | 2.046                  | 0.0000270 | 2.798     | 0.0002539 | 4.757       | 0.0008884 | 3.248         | 0.0000742 | 2.827       | 0.0000014 | 3.480        | 0.0000238 | 3.486        | 0.0000480 |
| IFN-γ    | 1.677                  | 0.0019620 | 4.314     | 0.0000064 | 5.493       | 0.0000533 | 4.974         | 0.0000001 | 4.534       | 0.0000018 | 5.567        | 0.0000174 | 3.997        | 0.0000028 |
| IFN-β    | 1.687                  | 0.0196360 | 2.200     | 0.0853799 | 2.138       | 0.0056859 | 2.032         | 0.0035558 | 1.609       | 0.0090557 | 1.338        | 0.2883588 | 1.579        | 0.0492593 |
| TNF-α    | 1.569                  | 0.0001740 | 2.114     | 0.0000006 | 2.448       | 0.0000282 | 2.195         | 0.0000000 | 2.166       | 0.0000001 | 2.146        | 0.0000000 | 2.087        | 0.0000002 |
| MCP-2    | 6.392                  | 0.0133480 | 14.030    | 0.0034929 | 26.835      | 0.0149017 | 22.058        | 0.0280604 | 18.792      | 0.0017614 | 14.604       | 0.0220437 | 16.325       | 0.0126738 |
| IL-12    | 1.179                  | 0.0920770 | 3.764     | 0.0035546 | 4.182       | 0.0006017 | 3.874         | 0.0000182 | 3.478       | 0.0000933 | 3.610        | 0.0000029 | 3.126        | 0.0008171 |
| SDF-1β   | 4.100                  | 0.0003030 | 7.099     | 0.0000009 | 11.212      | 0.0100450 | 7.664         | 0.0000002 | 6.580       | 0.0057105 | 5.760        | 0.0081427 | 6.329        | 0.0099694 |
| MIG      | 10.519                 | 0.0076240 | 12.500    | 0.0341172 | 22.505      | 0.0066723 | 18.067        | 0.0056154 | 10.190      | 0.0034069 | 10.613       | 0.0304912 | 10.594       | 0.0001738 |
| IL-15    | 1.069                  | 0.0093050 | 0.858     | 0.0017124 | 0.899       | 0.0019073 | 0.877         | 0.0001101 | 0.876       | 0.0006005 | 0.902        | 0.0011307 | 0.865        | 0.0000755 |
| MIP-1α   | 8.298                  | 0.0006040 | 12.470    | 0.0000478 | 22.917      | 0.0091999 | 17.710        | 0.0022051 | 15.643      | 0.0008783 | 12.601       | 0.0070619 | 13.580       | 0.0017738 |
| MIP-1β   | 7.603                  | 0.0002500 | 4.731     | 0.0002807 | 5.995       | 0.0001527 | 6.460         | 0.0107440 | 6.578       | 0.0012100 | 5.585        | 0.0360662 | 4.437        | 0.0015248 |

YU.2 ± ARV, 6 h post-treatment

| Cytokine | Treatment <sup>1</sup> |          |           |            |             |            |               |            |             |            |              |            |              |            |
|----------|------------------------|----------|-----------|------------|-------------|------------|---------------|------------|-------------|------------|--------------|------------|--------------|------------|
|          | Virus                  |          | TFV 35 µM |            | UC781 12 µM |            | TMC120 1.2 µM |            | T1249 10 µM |            | AMD3465 5 µM |            | CMPD167 5 µM |            |
|          | FC                     | <i>P</i> | FC        | <i>P</i>   | FC          | <i>P</i>   | FC            | <i>P</i>   | FC          | <i>P</i>   | FC           | <i>P</i>   | FC           | <i>P</i>   |
| IL-8     | 3.006                  | 0.00501  | 1.529     | 0.05733928 | 2.120       | 0.00436993 | 2.060         | 0.00076855 | 1.683       | 0.02468515 | 1.757        | 0.00998727 | 2.416        | 0.00279026 |
| MCP-1    | 3.238                  | 0.087653 | 1.499     | 0.15584023 | 2.187       | 0.01433895 | 2.168         | 0.01726747 | 1.738       | 0.06638911 | 1.644        | 0.10260723 | 2.972        | 0.03720446 |
| IL-6     | 2.017                  | 0.334037 | 0.764     | 0.68371768 | 1.049       | 0.9314167  | 1.038         | 0.94653174 | 0.819       | 0.75175364 | 0.743        | 0.65251238 | 1.299        | 0.65080303 |
| GCSF     | 1.504                  | 0.198353 | 2.008     | 0.00128579 | 2.198       | 0.00064578 | 2.146         | 0.00053549 | 2.055       | 0.00086059 | 2.043        | 0.00116224 | 2.285        | 0.00101014 |
| IL-1α    | 3.862                  | 0.000242 | 0.102     | 0.00194046 | 0.110       | 0.00203516 | 0.102         | 0.00193671 | 0.101       | 0.00192632 | 0.091        | 0.00182254 | 0.103        | 0.00195199 |
| IP-10    | 4.342                  | 0.025269 | 20.781    | 0.01017474 | 43.274      | 0.00109754 | 22.296        | 0.00291955 | 23.283      | 0.00079919 | 67.610       | 0.12207202 | 37.534       | 0.01205219 |
| IL-1β    | 2.307                  | 0.189003 | 1.407     | 0.14885625 | 1.746       | 0.23168245 | 1.471         | 0.18394224 | 1.626       | 0.12908468 | 0.922        | 0.7431148  | 1.600        | 0.09848836 |
| IL-16    | 1.142                  | 0.657738 | 0.424     | 0.05508423 | 0.374       | 0.04083203 | 0.398         | 0.04700847 | 0.326       | 0.03016336 | 1.012        | 0.96625343 | 0.356        | 0.03642212 |
| GMCSF    | 3.467                  | 0.013994 | 4.712     | 0.00086624 | 6.327       | 0.00059053 | 5.038         | 0.00034721 | 4.994       | 0.00013383 | 8.675        | 0.00010017 | 5.626        | 0.00060681 |
| IL-4     | 1.082                  | 0.059446 | 0.920     | 0.24376849 | 0.895       | 0.08667451 | 0.803         | 0.01628621 | 0.828       | 0.00202642 | 8.271        | 3.3093E-10 | 0.898        | 0.0062291  |
| IL-2     | 1.082                  | 0.062902 | 1.413     | 6.6863E-05 | 1.485       | 4.0905E-05 | 1.361         | 0.0002546  | 1.351       | 0.00030642 | 1.737        | 1.5916E-05 | 1.492        | 0.00049214 |
| TGF-β    | 1.464                  | 0.168631 | 2.917     | 0.00469705 | 3.354       | 0.00201696 | 2.750         | 0.00128127 | 2.786       | 0.00122284 | 43.216       | 1.5281E-05 | 3.619        | 2.0037E-05 |
| RANTES   | 1.063                  | 0.59086  | 1.944     | 0.00040634 | 2.129       | 0.00268375 | 1.785         | 0.00102752 | 1.714       | 0.00115577 | 5.264        | 1.8538E-05 | 2.113        | 0.00028452 |
| IFN-γ    | 1.337                  | 0.001258 | 4.364     | 8.3403E-06 | 4.870       | 1.7025E-08 | 4.275         | 1.1104E-06 | 4.561       | 1.7943E-05 | 4.759        | 0.00011577 | 5.073        | 6.0423E-05 |
| IFN-β    | 1.338                  | 0.11964  | 1.617     | 0.03739738 | 1.967       | 0.00227115 | 1.660         | 0.01091946 | 1.712       | 0.00886558 | 1.307        | 0.21776557 | 1.947        | 0.00616477 |
| TNF-α    | 1.375                  | 0.071877 | 2.754     | 0.00028377 | 3.548       | 0.01324633 | 2.877         | 0.00296032 | 3.147       | 0.00108178 | 1.506        | 0.00285317 | 2.849        | 0.00016861 |
| MCP-2    | 4.735                  | 0.067234 | 51.432    | 0.05072947 | 91.411      | 0.0094317  | 49.721        | 0.00670728 | 43.280      | 0.00222197 | 21.968       | 0.07121319 | 75.121       | 0.0670524  |
| IL-12    | 1.122                  | 0.416508 | 2.139     | 1.4441E-05 | 2.218       | 0.00015056 | 2.068         | 4.9714E-05 | 2.032       | 5.3004E-05 | 2.414        | 0.00416009 | 2.141        | 3.8922E-05 |
| SDF-1β   | 2.907                  | 0.006027 | 3.678     | 4.6573E-05 | 4.494       | 0.00141519 | 3.402         | 0.00024412 | 3.961       | 7.6582E-05 | 17.695       | 0.00634484 | 4.063        | 8.9628E-05 |
| MIG      | 4.542                  | 0.031247 | 9.817     | 0.07197795 | 15.825      | 0.00554168 | 7.305         | 0.00920757 | 10.045      | 0.00027651 | 6.370        | 0.00183757 | 15.425       | 0.03740879 |
| IL-15    | 1.033                  | 0.054584 | 1.803     | 3.5785E-09 | 1.828       | 6.9092E-08 | 1.797         | 1.0511E-08 | 1.802       | 9.1126E-09 | 0.661        | 0.00096647 | 1.799        | 2.3908E-08 |
| MIP-1α   | 4.008                  | 0.001695 | 19.311    | 0.00634913 | 28.010      | 0.00550377 | 14.926        | 0.00122992 | 19.808      | 0.00289946 | 20.279       | 0.00453498 | 22.071       | 0.00314702 |
| MIP-1β   | 3.862                  | 0.000242 | 8.908     | 0.000907   | 14.154      | 0.01166354 | 8.592         | 0.00078643 | 9.773       | 0.00012989 | 10.957       | 0.00171085 | 11.708       | 0.00348539 |

| NL4.3 ± ARV, 24 h post-treatment |                        |           |           |           |             |           |               |           |             |           |              |           |              |           |
|----------------------------------|------------------------|-----------|-----------|-----------|-------------|-----------|---------------|-----------|-------------|-----------|--------------|-----------|--------------|-----------|
| Cytokine                         | Treatment <sup>1</sup> |           |           |           |             |           |               |           |             |           |              |           |              |           |
|                                  | Virus                  |           | TFV 35 µM |           | UC781 12 µM |           | TMC120 1.2 µM |           | T1249 10 µM |           | AMD3465 5 µM |           | CMPD167 5 µM |           |
|                                  | FC                     | <i>P</i>  | FC        | <i>P</i>  | FC          | <i>P</i>  | FC            | <i>P</i>  | FC          | <i>P</i>  | FC           | <i>P</i>  | FC           | <i>P</i>  |
| IL-8                             | 1.401                  | 0.0174670 | 0.380     | 0.0004580 | 0.379       | 0.0001635 | 0.827         | 0.5454217 | 0.442       | 0.0084902 | 0.509        | 0.1100005 | 0.530        | 0.0074939 |
| MCP-1                            | 1.896                  | 0.3285710 | 0.366     | 0.2957276 | 0.376       | 0.3019378 | 0.824         | 0.7722618 | 0.484       | 0.3962649 | 0.396        | 0.3250243 | 0.738        | 0.6626601 |
| IL-6                             | 1.492                  | 0.3624030 | 0.239     | 0.0282220 | 0.227       | 0.0260925 | 0.521         | 0.1445797 | 0.314       | 0.0472173 | 0.341        | 0.0767192 | 0.446        | 0.0937537 |
| GCSF                             | 1.368                  | 0.5790030 | 0.356     | 0.2310158 | 0.355       | 0.2295146 | 0.819         | 0.7300002 | 0.466       | 0.3172024 | 0.438        | 0.2958473 | 0.594        | 0.4411945 |
| IL-1α                            | 2.480                  | 0.0051920 | 0.032     | 0.0002665 | 0.022       | 0.0002509 | 0.028         | 0.0002599 | 0.031       | 0.0002644 | 0.036        | 0.0002719 | 0.028        | 0.0002603 |
| IP-10                            | 3.877                  | 0.0055860 | 2.899     | 0.0190658 | 5.160       | 0.0026196 | 5.993         | 0.0010067 | 3.816       | 0.0070745 | 3.469        | 0.0112389 | 4.189        | 0.0021086 |
| IL-1β                            | 4.501                  | 0.0014490 | 0.995     | 0.9860854 | 0.578       | 0.0273499 | 0.787         | 0.1509196 | 0.896       | 0.5679274 | 1.329        | 0.2821959 | 0.671        | 0.1357376 |
| IL-16                            | 1.988                  | 0.0397330 | 0.722     | 0.3828574 | 0.912       | 0.7374762 | 0.834         | 0.4831560 | 0.856       | 0.5525870 | 1.060        | 0.8097070 | 0.603        | 0.1455358 |
| GMCSF                            | 1.312                  | 0.5101760 | 0.346     | 0.0925471 | 0.396       | 0.1186114 | 0.634         | 0.3685488 | 0.418       | 0.1314363 | 0.401        | 0.1441656 | 0.546        | 0.2294943 |
| IL-4                             | 0.960                  | 0.5023540 | 0.772     | 0.0986937 | 0.891       | 0.4271575 | 0.853         | 0.3059482 | 0.815       | 0.0272299 | 0.963        | 0.6827788 | 0.728        | 0.0184228 |
| IL-2                             | 1.191                  | 0.0011090 | 0.293     | 0.0000004 | 0.363       | 0.0000066 | 0.320         | 0.0000007 | 0.346       | 0.0000005 | 0.346        | 0.0000004 | 0.338        | 0.0000130 |
| TGF-β                            | 1.492                  | 0.1932830 | 10.365    | 0.0000740 | 12.039      | 0.0001273 | 12.670        | 0.0000762 | 11.025      | 0.0000002 | 10.692       | 0.0000017 | 12.212       | 0.0010466 |
| RANTES                           | 2.815                  | 0.0000250 | 3.308     | 0.0102562 | 3.903       | 0.0009570 | 4.736         | 0.0023954 | 3.643       | 0.0003587 | 3.934        | 0.0370814 | 9.917        | 0.0020720 |
| IFN-γ                            | 1.982                  | 0.0028020 | 3.485     | 0.0000771 | 3.843       | 0.0013911 | 4.053         | 0.0001173 | 3.841       | 0.0000000 | 3.923        | 0.0000994 | 4.134        | 0.0007759 |
| IFN-β                            | 1.352                  | 0.4113200 | 0.827     | 0.5479382 | 0.856       | 0.6350494 | 0.938         | 0.8358543 | 0.791       | 0.4550187 | 0.891        | 0.7110336 | 0.891        | 0.7029955 |
| TNF-α                            | 0.802                  | 0.6050640 | 1.080     | 0.8320222 | 1.144       | 0.7077689 | 1.090         | 0.8123863 | 1.084       | 0.8233903 | 1.114        | 0.7633241 | 1.048        | 0.8981908 |
| MCP-2                            | 2.455                  | 0.2031060 | 0.640     | 0.5562800 | 0.944       | 0.9306180 | 2.208         | 0.2880729 | 0.932       | 0.9154170 | 1.284        | 0.7970907 | 1.460        | 0.5731367 |
| IL-12                            | 0.849                  | 0.3861990 | 1.991     | 0.0280854 | 2.191       | 0.0195625 | 2.261         | 0.0050894 | 2.120       | 0.0018222 | 2.144        | 0.0014094 | 2.366        | 0.0323476 |
| SDF-1β                           | 0.961                  | 0.8926440 | 0.663     | 0.3204186 | 0.924       | 0.8404369 | 0.910         | 0.7925027 | 0.576       | 0.1608611 | 0.779        | 0.5209030 | 1.005        | 0.9912996 |
| MIG                              | 2.743                  | 0.0034150 | 2.656     | 0.0143274 | 2.709       | 0.0146998 | 4.015         | 0.0278270 | 3.074       | 0.0361457 | 2.294        | 0.1717037 | 4.242        | 0.0032220 |
| IL-15                            | 0.996                  | 0.9086240 | 0.784     | 0.0002704 | 0.777       | 0.0002198 | 0.775         | 0.0003466 | 0.776       | 0.0002565 | 0.788        | 0.0008620 | 0.778        | 0.0003862 |
| MIP-1α                           | 2.039                  | 0.0005010 | 0.894     | 0.7355809 | 1.240       | 0.4266070 | 1.337         | 0.3961376 | 0.885       | 0.4915297 | 1.375        | 0.4053038 | 1.844        | 0.0240198 |
| MIP-1β                           | 1.906                  | 0.0003610 | 0.880     | 0.5566051 | 0.777       | 0.1851834 | 0.921         | 0.6665062 | 0.898       | 0.5177726 | 1.197        | 0.6326865 | 1.098        | 0.7790910 |

| YU.2 ± ARV, 24 h post-treatment |                        |           |           |           |             |           |               |           |             |           |              |           |              |           |
|---------------------------------|------------------------|-----------|-----------|-----------|-------------|-----------|---------------|-----------|-------------|-----------|--------------|-----------|--------------|-----------|
| Cytokine                        | Treatment <sup>1</sup> |           |           |           |             |           |               |           |             |           |              |           |              |           |
|                                 | Virus                  |           | TFV 35 µM |           | UC781 12 µM |           | TMC120 1.2 µM |           | T1249 10 µM |           | AMD3465 5 µM |           | CMPD167 5 µM |           |
|                                 | FC                     | <i>P</i>  | FC        | <i>P</i>  | FC          | <i>P</i>  | FC            | <i>P</i>  | FC          | <i>P</i>  | FC           | <i>P</i>  | FC           | <i>P</i>  |
| IL-8                            | 1.337                  | 0.0389870 | 0.473     | 0.0011165 | 0.410       | 0.0012650 | 0.612         | 0.0659179 | 0.556       | 0.0012095 | 0.575        | 0.0028104 | 0.712        | 0.0674364 |
| MCP-1                           | 1.213                  | 0.7172410 | 0.352     | 0.2829778 | 0.370       | 0.2997611 | 0.819         | 0.7661927 | 0.607       | 0.5121328 | 0.565        | 0.4613420 | 0.649        | 0.5556887 |
| IL-6                            | 1.331                  | 0.5313170 | 0.308     | 0.0495420 | 0.441       | 0.1161348 | 0.618         | 0.2791819 | 0.473       | 0.1029400 | 0.435        | 0.0799426 | 0.481        | 0.1127375 |
| GCSF                            | 1.021                  | 0.9709800 | 0.409     | 0.2692106 | 0.453       | 0.3048207 | 0.829         | 0.7442351 | 0.673       | 0.5302501 | 0.611        | 0.4534366 | 0.715        | 0.5869216 |
| IL-1α                           | 1.756                  | 0.0414550 | 0.090     | 0.0003861 | 0.046       | 0.0002881 | 0.088         | 0.0003759 | 0.057       | 0.0003105 | 0.065        | 0.0003231 | 0.056        | 0.0003073 |
| IP-10                           | 1.912                  | 0.2657580 | 1.807     | 0.0855622 | 2.540       | 0.0081892 | 2.681         | 0.0134881 | 2.607       | 0.1155145 | 13.479       | 0.0001061 | 2.585        | 0.0261995 |
| IL-1β                           | 2.417                  | 0.0066270 | 6.429     | 0.0454565 | 1.926       | 0.3618078 | 6.798         | 0.0124335 | 2.820       | 0.2139008 | 2.700        | 0.0603590 | 2.396        | 0.2224539 |
| IL-16                           | 1.362                  | 0.3189360 | 1.047     | 0.8488210 | 0.998       | 0.9962949 | 1.232         | 0.3834499 | 1.074       | 0.8327936 | 0.905        | 0.7867994 | 1.040        | 0.8652824 |
| GMCSF                           | 0.863                  | 0.7367920 | 1.093     | 0.8167714 | 1.164       | 0.7225470 | 1.182         | 0.6857004 | 1.501       | 0.3689753 | 1.495        | 0.2779533 | 1.268        | 0.5157069 |
| IL-4                            | 0.928                  | 0.2759560 | 0.921     | 0.4309068 | 0.930       | 0.3807783 | 1.157         | 0.1452495 | 0.988       | 0.8903432 | 7.059        | 0.0000000 | 0.951        | 0.6250305 |
| IL-2                            | 0.985                  | 0.5803690 | 1.390     | 0.0000100 | 1.439       | 0.0000020 | 1.473         | 0.0001836 | 1.413       | 0.0000555 | 1.650        | 0.0000004 | 1.479        | 0.0000375 |
| TGF-β                           | 0.891                  | 0.7541950 | 1.460     | 0.1984401 | 1.703       | 0.0650697 | 1.824         | 0.0693413 | 1.861       | 0.1645517 | 15.462       | 0.0000090 | 1.723        | 0.1038772 |
| RANTES                          | 1.504                  | 0.0758560 | 1.773     | 0.0026096 | 2.149       | 0.0114397 | 1.944         | 0.0145363 | 2.553       | 0.0518254 | 13.256       | 0.0060641 | 1.925        | 0.0171040 |
| IFN-γ                           | 1.247                  | 0.0058610 | 3.580     | 0.0001059 | 3.913       | 0.0000585 | 4.614         | 0.0000549 | 4.434       | 0.0012683 | 4.920        | 0.0000011 | 4.614        | 0.0003318 |
| IFN-β                           | 1.069                  | 0.8200220 | 1.082     | 0.7848671 | 1.219       | 0.4989762 | 1.455         | 0.2998750 | 1.581       | 0.2502435 | 0.987        | 0.9608318 | 1.431        | 0.2153864 |
| TNF-α                           | 0.642                  | 0.3627100 | 2.934     | 0.0148127 | 1.522       | 0.2557333 | 2.771         | 0.0544393 | 2.162       | 0.0380437 | 0.948        | 0.8920477 | 2.117        | 0.1785339 |
| MCP-2                           | 0.580                  | 0.5141360 | 3.101     | 0.1069450 | 3.776       | 0.0451047 | 3.853         | 0.1614117 | 6.990       | 0.0751679 | 4.375        | 0.0782068 | 5.522        | 0.0140242 |
| IL-12                           | 0.732                  | 0.1528990 | 1.568     | 0.0185650 | 1.400       | 0.0477778 | 1.687         | 0.0101278 | 1.538       | 0.0438310 | 1.743        | 0.0270627 | 1.407        | 0.0567381 |
| SDF-1β                          | 0.621                  | 0.2524090 | 1.085     | 0.7798560 | 0.748       | 0.3843408 | 1.297         | 0.3501456 | 1.029       | 0.9232182 | 3.064        | 0.0227383 | 0.912        | 0.7749842 |
| MIG                             | 1.121                  | 0.7384060 | 2.437     | 0.0329276 | 3.168       | 0.0353016 | 3.294         | 0.0732195 | 4.191       | 0.0793329 | 2.186        | 0.0689414 | 3.912        | 0.0119486 |
| IL-15                           | 0.943                  | 0.1210740 | 1.659     | 0.0000005 | 1.632       | 0.0000011 | 1.712         | 0.0000062 | 1.691       | 0.0000395 | 0.835        | 0.0321624 | 1.684        | 0.0000057 |
| MIP-1α                          | 1.372                  | 0.0223350 | 4.752     | 0.0296481 | 2.035       | 0.0068486 | 3.459         | 0.0021814 | 4.643       | 0.0028506 | 2.817        | 0.0352816 | 4.536        | 0.0620541 |
| MIP-1β                          | 1.200                  | 0.3449600 | 2.825     | 0.0118524 | 1.708       | 0.0637622 | 2.683         | 0.0071793 | 3.314       | 0.0307902 | 2.687        | 0.1860332 | 2.960        | 0.0172630 |

<sup>1</sup>Significantly modulated cytokines as determined by unpaired *t* test with no correction for multiple testing (*P* < 0.05). FC: Fold change
