# Supplementary material for: Early Colorectal Responses to HIV-1 and Modulation by Antiretroviral Drugs
Source: MDPI journal article supplement (doi:10.3390/vaccines9030231), 2021-03-08
Supplement: s1 [file s1]

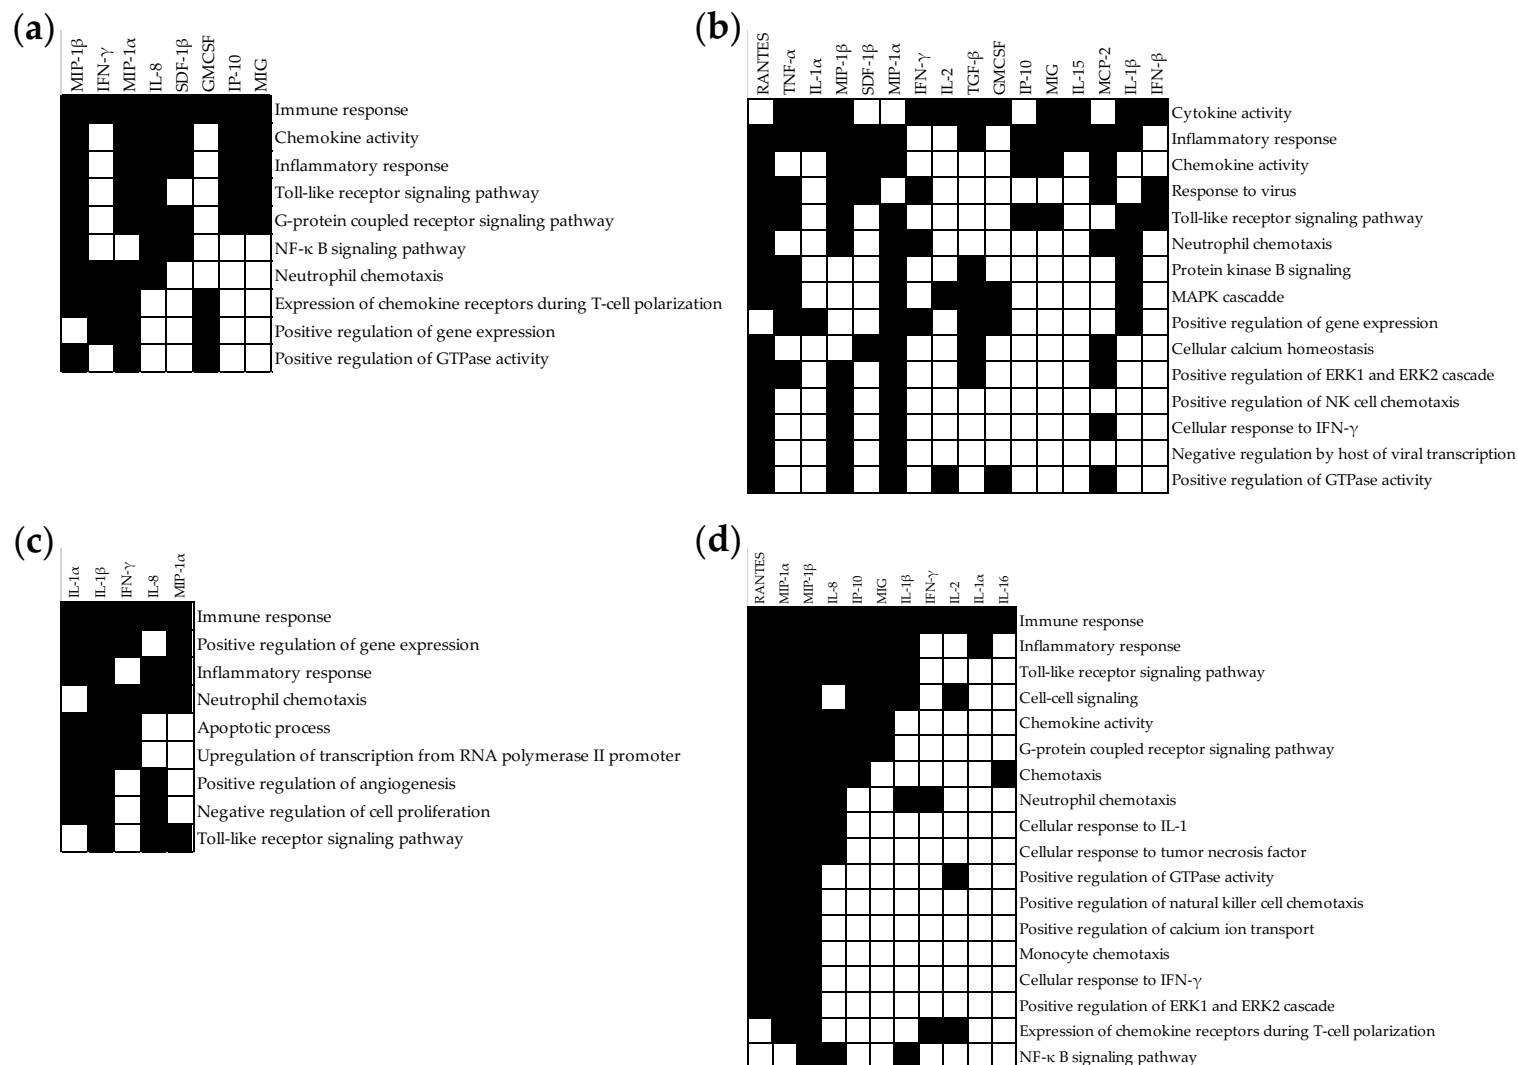

**Figure S3.** Biological processes associated with up-regulated cytokines in culture supernatants of colorectal explants infected with HIV-1 YU.2 or NL4.3. Cytokine levels were measured in culture supernatants from explants challenged with YU.2 (**a, c**) or NL4.3 (**b, d**) harvested 6 (**a, b**) or 24 h (**c, d**) post-challenge. Functional pathways were determined by DAVID 6.8 software for significantly up-regulated cytokines in infected explants compared to unchallenged control samples. Black squares represent analytes associated with pathway.
