# Supplementary material for: Early Colorectal Responses to HIV-1 and Modulation by Antiretroviral Drugs
Source: MDPI journal article supplement (doi:10.3390/vaccines9030231), 2021-03-08
Supplement: s1 [file s1]

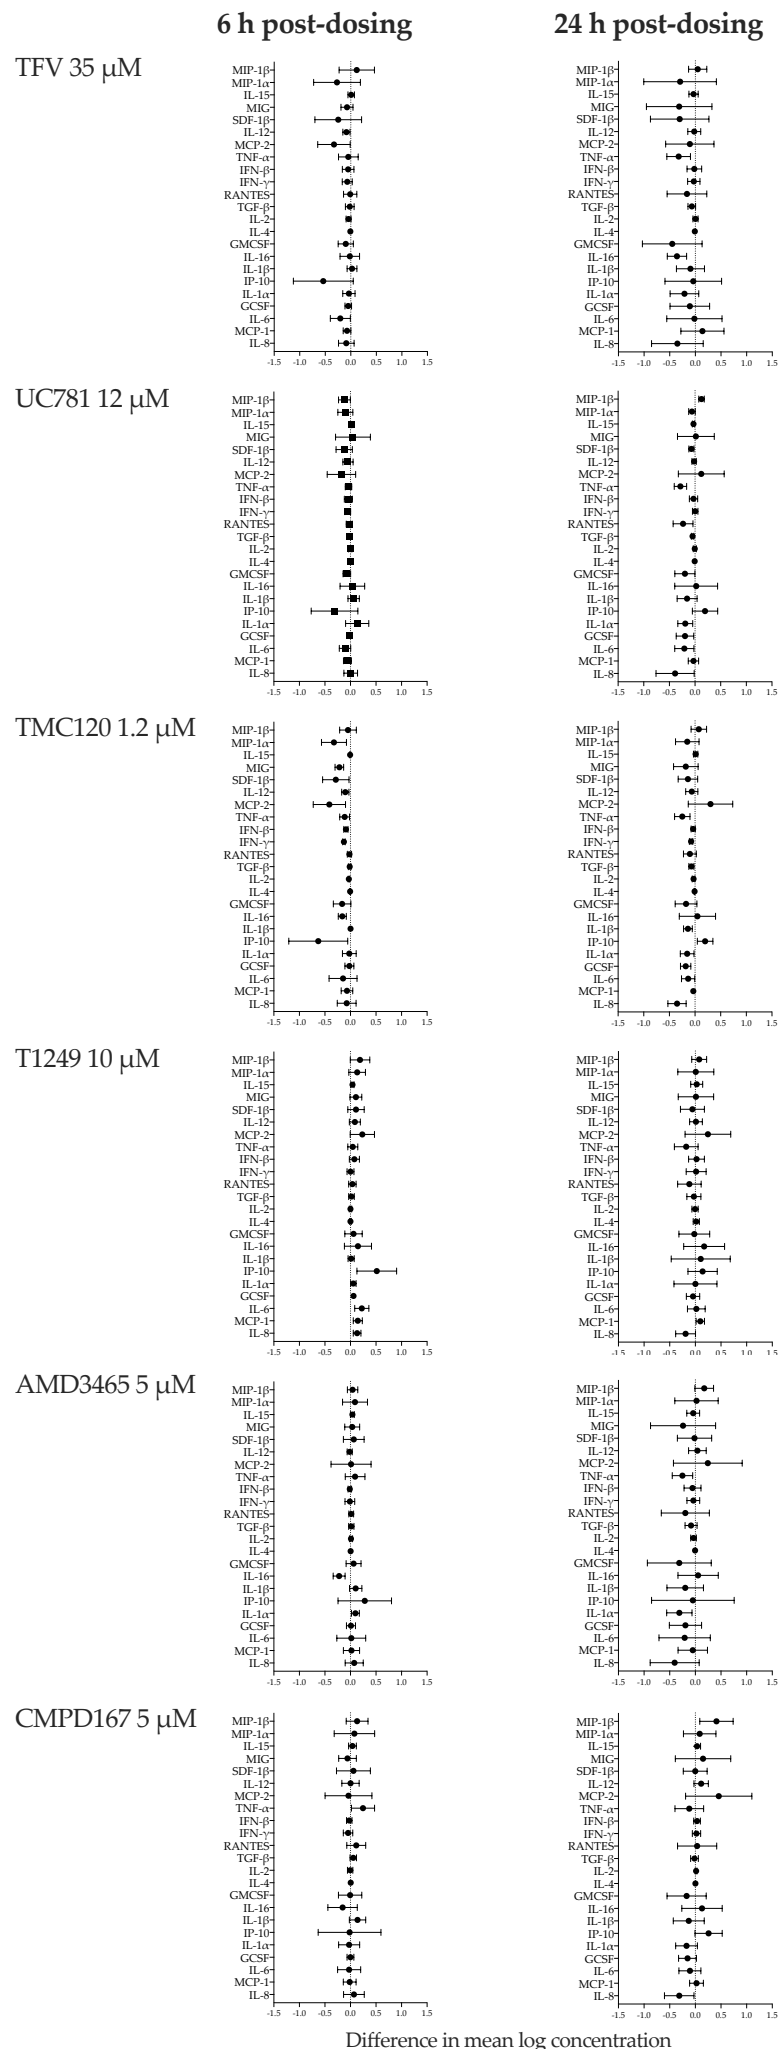

**Figure S8.** Effect of ARVs on the mucosal cytokine profile of colorectal explants. Difference of cytokine concentrations between *ex vivo* dosing with ARVs and non-treatment in mean log concentration  $\pm$  SD from two independent experiments performed in quadruplicate.
