# Supplementary material for: Early Colorectal Responses to HIV-1 and Modulation by Antiretroviral Drugs
Source: MDPI journal article supplement (doi:10.3390/vaccines9030231), 2021-03-08
Supplement: s1 [file s1]

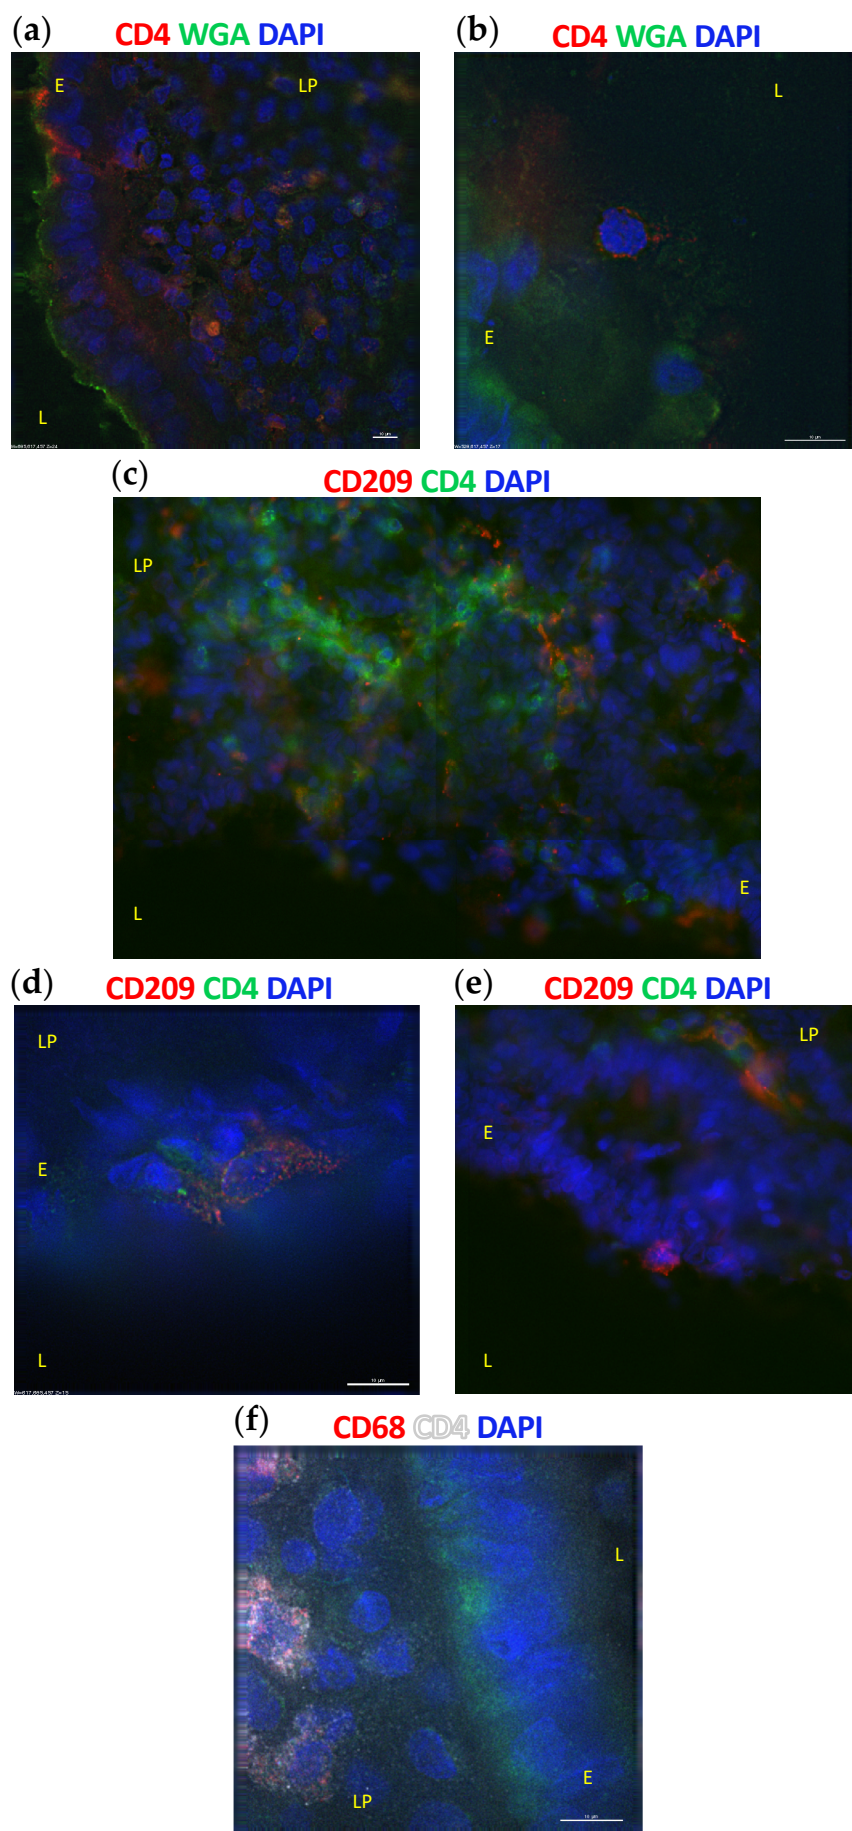

**Figure S1.** Tissue resident immune cells in colorectal tissue. Representative tissue cryosections immunofluorescently stained with (a, b) OKT4-RedX to detect CD4<sup>+</sup> cells and WGA-Cy5 to label the columnar epithelium; (c, d, e)  $\alpha$ -CD209-RedX and  $\alpha$ -CD4-AlexaFluor647 antibodies to detect DCs and CD4<sup>+</sup> cells, respectively; or (f)  $\alpha$ -CD68-RedX and  $\alpha$ -CD4-AlexaFluor647 antibodies to detect macrophages and CD4<sup>+</sup> cells, respectively. Cell nuclei stained with DAPI (blue). White bar = 10  $\mu$ m. L: lumen; E: epithelium; LP: lamina propria.
