# Supplementary material for: Early Colorectal Responses to HIV-1 and Modulation by Antiretroviral Drugs
Source: MDPI journal article supplement (doi:10.3390/vaccines9030231), 2021-03-08
Supplement: s1 [file s1]

**Table S1.** Concentrations of MIG and CCR5 chemokines secreted by colorectal explants infected with HIV-1 YU.2 or NL4.3.

| Chemokine      | Time post-challenge (h) | [Chemokine in culture supernatant] <sup>1</sup> (pg/ml) |                |
|----------------|-------------------------|---------------------------------------------------------|----------------|
|                |                         | YU.2                                                    | NL4.3          |
| MIG            | 6                       | 10.78 ± 7.46                                            | 28.98 ± 14.58  |
|                | 24                      | 75.76 ± 32.97                                           | 189.80 ± 38.37 |
| RANTES         | 6                       | 0.01 ± 0.03                                             | 0.17 ± 0.02    |
|                | 24                      | 0.16 ± 0.09                                             | 0.45 ± 0.05    |
| MIP-1 $\alpha$ | 6                       | 0.61 ± 0.21                                             | 1.48 ± 0.44    |
|                | 24                      | 2.38 ± 0.41                                             | 3.63 ± 0.54    |
| MIP-1 $\beta$  | 6                       | 1.13 ± 0.26                                             | 2.60 ± 0.66    |
|                | 24                      | 2.45 ± 0.85                                             | 4.12 ± 0.47    |

<sup>1</sup>Concentration value for each cytokine after subtraction of background value (average of concentrations in supernatants from unchallenged control tissue explants). Data are mean ± SD of four independent experiments performed with tissue from different donors.
