# Supplementary material for: Early Colorectal Responses to HIV-1 and Modulation by Antiretroviral Drugs
Source: MDPI journal article supplement (doi:10.3390/vaccines9030231), 2021-03-08
Supplement: s1 [file s1]

**Table S2.** List of significantly modulated genes by HIV-1 infection of colorectal explants<sup>1</sup>.

YU.2, 6 h post-challenge

| Gene        | Definition                                                                                                   | Virus vs. Ctrl FC | P value  |
|-------------|--------------------------------------------------------------------------------------------------------------|-------------------|----------|
| GBP1        | Homo sapiens guanylate binding protein 1, interferon-inducible, 67kDa                                        | 1.398             | 0.003676 |
| IL6         | Homo sapiens interleukin 6 (interferon, beta 2)                                                              | 0.325             | 0.027    |
| CIDEC       | Homo sapiens cell death-inducing DFFA-like effector c                                                        | 0.725             | 0.005806 |
| BATF2       | Homo sapiens basic leucine zipper transcription factor, ATF-like 2                                           | 1.569             | 0.023182 |
| MSRB1       | Homo sapiens selenoprotein X, 1 (SEPX1)                                                                      | 1.265             | 0.044604 |
| FKBP4       | Homo sapiens FK506 binding protein 4, 59kDa                                                                  | 1.380             | 0.002525 |
| CXCL9       | Homo sapiens chemokine (C-X-C motif) ligand 9                                                                | 1.834             | 0.001204 |
| IL32        | Homo sapiens interleukin 32, transcript variant 4                                                            | 1.271             | 0.01287  |
| LOC613037   | Homo sapiens nuclear pore complex interacting protein pseudogene on chromosome 16.                           | 1.148             | 0.000475 |
| CLDN4       | Homo sapiens claudin 4 (CLDN4)                                                                               | 0.801             | 0.044791 |
| SPSB2       | Homo sapiens splA/ryanodine receptor domain and SOCS box containing 2                                        | 0.627             | 0.023888 |
| HSPH1       | Homo sapiens heat shock 105kDa/110kDa protein 1                                                              | 1.162             | 0.03248  |
| CKS2        | Homo sapiens CDC28 protein kinase regulatory subunit 2                                                       | 1.160             | 0.007754 |
| MUC17       | Homo sapiens mucin 17, cell surface associated                                                               | 0.835             | 0.025487 |
| SERPINB2    | Homo sapiens serpin peptidase inhibitor, clade B (ovalbumin), member 2                                       | 0.730             | 0.001766 |
| TAP1        | Homo sapiens transporter 1, ATP-binding cassette, sub-family B (MDR/TAP)                                     | 1.571             | 0.019826 |
| HSPA6       | Homo sapiens heat shock 70kDa protein 6 (HSP70B')                                                            | 1.318             | 0.000277 |
| CHGA        | Homo sapiens chromogranin A (parathyroid secretory protein 1)                                                | 0.664             | 0.008462 |
| CEACAM6     | Homo sapiens carcinoembryonic antigen-related cell adhesion molecule 6 (non-specific cross reacting antigen) | 0.860             | 0.002765 |
| ABCC5       | Homo sapiens ATP-binding cassette, sub-family C (CFTR/MRP), member 5, transcript variant 1                   | 0.935             | 0.000015 |
| RHOD        | Homo sapiens ras homolog gene family, member D                                                               | 0.830             | 0.000098 |
| PERP        | Homo sapiens PERP, TP53 apoptosis effector                                                                   | 0.734             | 0.027909 |
| IL1RN       | Homo sapiens interleukin 1 receptor antagonist, transcript variant 4                                         | 0.618             | 0.04395  |
| SNORD15B    | Homo sapiens small nucleolar RNA, C/D box 15B on chromosome 11.                                              | 1.255             | 0.017743 |
| CDA         | Homo sapiens cytidine deaminase                                                                              | 0.784             | 0.005149 |
| INDO        | Homo sapiens indoleamine-pyrrole 2,3 dioxygenase                                                             | 1.479             | 0.017511 |
| HS.545589   | Human small nuclear RNA U6atac, partial sequence                                                             | 1.256             | 0.006587 |
| GRAMD3      | Homo sapiens GRAM domain containing 2B3                                                                      | 1.331             | 0.091592 |
| COL1A2      | Homo sapiens collagen, type I, alpha 2                                                                       | 0.605             | 0.001079 |
| WARS        | Homo sapiens tryptophanyl-tRNA synthetase, transcript variant 2                                              | 1.932             | 0.001899 |
| WBP5/TCEAL9 | Homo sapiens WW domain binding protein 5, transcript variant 2                                               | 1.392             | 0.001918 |
| RN7SK       | Homo sapiens RNA, 7SK small nuclear on chromosome 6.                                                         | 1.164             | 0.004421 |

NL4.3, 6 h post-challenge

| Gene        | Definition                                                                                                                      | Virus vs. Ctrl FC | P value  |
|-------------|---------------------------------------------------------------------------------------------------------------------------------|-------------------|----------|
| KRT80       | PREDICTED: similar to Keratin, type II cytoskeletal 8 (Cytokeratin-8) (CK-8)                                                    | 0.664             | 0.000212 |
| GBP1        | Homo sapiens guanylate binding protein 1, interferon-inducible, 67kDa                                                           | 1.846             | 0.022778 |
| IL6         | Homo sapiens interleukin 6 (interferon, beta 2)                                                                                 | 0.535             | 0.037185 |
| FTHL11      | Homo sapiens ferritin, heavy polypeptide-like 11 on chromosome 8.                                                               | 0.571             | 0.00406  |
| LOC23117    | PREDICTED: Homo sapiens KIAA0220-like protein, transcript variant 16                                                            | 1.582             | 0.047665 |
| HIST1H3H    | Homo sapiens histone cluster 1, H3h                                                                                             | 1.510             | 0.026331 |
| CIDEC       | Homo sapiens cell death-inducing DFFA-like effector c                                                                           | 0.584             | 0.047736 |
| MSRB1       | Homo sapiens selenoprotein X, 1 (SEPX1)                                                                                         | 1.559             | 0.002401 |
| AGPAT2      | Homo sapiens 1-acylglycerol-3-phosphate O-acyltransferase 2 (lysophosphatidic acid acyltransferase, beta), transcript variant 2 | 0.611             | 0.001333 |
| FKBP4       | Homo sapiens FK506 binding protein 4, 59kDa                                                                                     | 1.690             | 0.003843 |
| CXCL9       | Homo sapiens chemokine (C-X-C motif) ligand 9                                                                                   | 3.438             | 0.028569 |
| IL32        | Homo sapiens interleukin 32, transcript variant 4,                                                                              | 1.604             | 0.019126 |
| HSPA1L      | Homo sapiens heat shock 70kDa protein 1-like                                                                                    | 1.626             | 0.000188 |
| KCNK1       | Homo sapiens potassium channel, subfamily K, member 1                                                                           | 0.658             | 0.000141 |
| CLDN4       | Homo sapiens claudin 4                                                                                                          | 0.640             | 0.03462  |
| KRT20       | Homo sapiens keratin 20                                                                                                         | 0.645             | 0.015206 |
| PI3         | Homo sapiens peptidase inhibitor 3, skin-derived (SKALP)                                                                        | 0.665             | 0.008643 |
| GUCA2A      | Homo sapiens guanylate cyclase activator 2A (guanylin)                                                                          | 0.619             | 0.024824 |
| C4ORF7      | Homo sapiens chromosome 4 open reading frame 7                                                                                  | 1.165             | 0.03018  |
| QSOX1       | Homo sapiens quiescin Q6 sulfhydryl oxidase 1, transcript variant 2                                                             | 0.521             | 0.016957 |
| HSPD1       | Homo sapiens heat shock 60kDa protein 1 (chaperonin), nuclear gene encoding mitochondrial protein, transcript variant 1         | 1.580             | 0.040898 |
| CCL20       | Homo sapiens chemokine (C-C motif) ligand 20                                                                                    | 1.737             | 0.016764 |
| CXCL5       | Homo sapiens chemokine (C-X-C motif) ligand 5                                                                                   | 0.661             | 0.008863 |
| CKS2        | Homo sapiens CDC28 protein kinase regulatory subunit 2                                                                          | 1.596             | 0.005492 |
| AURKB       | Homo sapiens aurora kinase B                                                                                                    | 0.698             | 0.030258 |
| LOC85389    | Homo sapiens RNA, small nucleolar on chromosome 11.                                                                             | 1.601             | 0.005874 |
| CACYBP      | Homo sapiens calyculin binding protein, transcript variant 1                                                                    | 1.690             | 0.017904 |
| HSPA6       | Homo sapiens heat shock 70kDa protein 6 (HSP70B')                                                                               | 1.707             | 0.02195  |
| CEACAM6     | Homo sapiens carcinoembryonic antigen-related cell adhesion molecule 6                                                          | 0.629             | 0.00582  |
| HS.551847   | 601452348F1 NIH_MGC_66 Homo sapiens cDNA clone IMAGE:3856355 5                                                                  | 0.642             | 0.002128 |
| DHRS9       | Homo sapiens dehydrogenase/reductase (SDR family) member 9, transcript variant 1                                                | 0.667             | 0.034626 |
| RHOD        | Homo sapiens ras homolog gene family, member D                                                                                  | 0.652             | 0.002925 |
| IL1RN       | Homo sapiens interleukin 1 receptor antagonist, transcript variant 4                                                            | 0.685             | 0.030337 |
| EPB41L2     | Homo sapiens erythrocyte membrane protein band 4.1-like 2                                                                       | 0.646             | 0.000204 |
| CDA         | Homo sapiens cytidine deaminase                                                                                                 | 0.586             | 0.022231 |
| TMEM17      | Homo sapiens transmembrane protein 17                                                                                           | 1.694             | 0.005234 |
| COL7A1      | Homo sapiens collagen, type VII, alpha 1 (epidermolysis bullosa, dystrophic, dominant and recessive)                            | 1.582             | 0.00063  |
| CCT6A       | Homo sapiens chaperonin containing TCP1, subunit 6A, transcript variant 1                                                       | 1.513             | 0.000422 |
| LOC643300   | PREDICTED: Homo sapiens similar to 60 kDa heat shock protein, mitochondrial precursor (Hsp60) (60 kDa chaperonin) (CPN60)       | 1.829             | 0.017949 |
| GRAMD3      | Homo sapiens GRAM domain containing 3                                                                                           | 1.544             | 0.031316 |
| DSC2        | Homo sapiens desmocollin 2, transcript variant Dsc2b,                                                                           | 0.648             | 0.00021  |
| HIST1H2BG   | Homo sapiens histone cluster 1, H2bg                                                                                            | 1.555             | 0.000003 |
| CRYAB       | Homo sapiens crystallin, alpha B                                                                                                | 1.669             | 0.004446 |
| WBP5/TCEAL9 | Homo sapiens WW domain binding protein 5, transcript variant 2                                                                  | 1.691             | 0.004923 |
| WARS        | Homo sapiens tryptophanyl-tRNA synthetase, transcript variant 1                                                                 | 2.003             | 0.045382 |
| GBP2        | Homo sapiens guanylate binding protein 2, interferon-inducible                                                                  | 1.715             | 0.000055 |
| DNAJB1      | Homo sapiens DnaJ (Hsp40) homolog, subfamily B, member 1                                                                        | 1.905             | 0.009926 |
| OAT         | Homo sapiens ornithine aminotransferase (gyrate atrophy), nuclear gene encoding mitochondrial protein                           | 1.546             | 0.043794 |
| RN7SK       | Homo sapiens RNA, 7SK small nuclear on chromosome 6.                                                                            | 1.501             | 0.006451 |
| ABCB1       | Homo sapiens ATP-binding cassette, sub-family B (MDR/TAP), member 1                                                             | 0.650             | 0.016885 |
| IFNG        | Homo sapiens interferon, gamma                                                                                                  | 1.947             | 0.011766 |
| OSTALPHA    | Homo sapiens organic solute transporter alpha                                                                                   | 0.625             | 0.04906  |

## YU.2, 24 h post-challenge

| Gene           | Definition                                                                                          | Virus vs. Ctrl FC | P value  |
|----------------|-----------------------------------------------------------------------------------------------------|-------------------|----------|
| TPM2           | Homo sapiens tropomyosin 2 (beta), transcript variant 2                                             | 1.545             | 0.044883 |
| VAMP5          | Homo sapiens vesicle-associated membrane protein 5 (myobrevin)                                      | 1.246             | 0.02593  |
| HMGCR          | Homo sapiens 3-hydroxy-3-methylglutaryl-Coenzyme A reductase                                        | 0.755             | 0.000034 |
| BANK1          | Homo sapiens B-cell scaffold protein with ankyrin repeats 1, transcript variant 2,                  | 0.598             | 0.012496 |
| TAGLN          | Homo sapiens transgelin, transcript variant 2                                                       | 1.577             | 0.032365 |
| IFI6           | Homo sapiens interferon, alpha-inducible protein 6, transcript variant 3                            | 0.610             | 0.016017 |
| CCL8           | Homo sapiens chemokine (C-C motif) ligand 8                                                         | 1.406             | 0.021607 |
| CXCL14         | Homo sapiens chemokine (C-X-C motif) ligand 14                                                      | 1.717             | 0.018249 |
| PRRX1          | Homo sapiens paired related homeobox 1, transcript variant pmx-1a                                   | 0.639             | 0.010154 |
| CTGF           | Homo sapiens connective tissue growth factor                                                        | 1.638             | 0.022762 |
| PI3            | Homo sapiens peptidase inhibitor 3, skin-derived (SKALP)                                            | 0.626             | 0.004103 |
| MMP12          | Homo sapiens matrix metalloproteinase 12 (macrophage elastase)                                      | 0.560             | 0.025793 |
| IL1B           | Homo sapiens interleukin 1, beta                                                                    | 0.554             | 0.02187  |
| TFF1           | Homo sapiens trefoil factor 1                                                                       | 0.661             | 0.035134 |
| CXCL5          | Homo sapiens chemokine (C-X-C motif) ligand 5                                                       | 0.558             | 0.000007 |
| GPR183         | Homo sapiens Epstein-Barr virus induced gene 2 (lymphocyte-specific G protein-coupled receptor)     | 0.659             | 0.031629 |
| MMP3           | Homo sapiens matrix metalloproteinase 3 (stromelysin 1, progelatinase)                              | 0.589             | 0.048596 |
| CRISPLD2       | Homo sapiens cysteine-rich secretory protein LCCL domain containing 2                               | 1.581             | 0.040187 |
| BATF3          | Homo sapiens basic leucine zipper transcription factor, ATF-like 3                                  | 1.187             | 0.018133 |
| GFPT1          | Homo sapiens glutamine-fructose-6-phosphate transaminase 1                                          | 0.626             | 0.039843 |
| ACTG2          | Homo sapiens actin, gamma 2, smooth muscle, enteric                                                 | 1.868             | 0.01845  |
| CD83           | Homo sapiens CD83 molecule, transcript variant 2                                                    | 0.651             | 0.039298 |
| NOS2A          | Homo sapiens nitric oxide synthase 2A (inducible, hepatocytes), transcript variant 2                | 1.284             | 0.016988 |
| ADH1C          | Homo sapiens alcohol dehydrogenase 1C (class I), gamma polypeptide                                  | 1.604             | 0.020834 |
| ARRDC4         | Homo sapiens arrestin domain containing 4                                                           | 0.667             | 0.035182 |
| IFI30          | Homo sapiens interferon, gamma-inducible protein 30                                                 | 1.305             | 0.008927 |
| HIGD1A         | Homo sapiens HIG1 domain family, member 1A, transcript variant 1,                                   | 0.881             | 0.008539 |
| TMEM189-UBE2V1 | Homo sapiens TMEM189-UBE2V1, transcript variant 2,                                                  | 0.640             | 0.00567  |
| SERPINB2       | Homo sapiens serpin peptidase inhibitor, clade B (ovalbumin), member 2                              | 0.380             | 0.000006 |
| HSPA6          | Homo sapiens heat shock 70kDa protein 6 (HSP70B')                                                   | 1.629             | 0.001648 |
| TMEM45B        | Homo sapiens transmembrane protein 45B                                                              | 0.664             | 0.012473 |
| LRP4           | Homo sapiens low density lipoprotein receptor-related protein 4                                     | 0.704             | 0.018154 |
| IFI6           | Homo sapiens interferon, alpha-inducible protein 6, transcript variant 2,                           | 0.476             | 0.026821 |
| IL33           | Homo sapiens interleukin 33                                                                         | 0.595             | 0.004163 |
| SLC41A2        | Homo sapiens solute carrier family 41, member 2                                                     | 0.651             | 0.001072 |
| HIST2H2AA3     | Homo sapiens histone cluster 2, H2aa3                                                               | 1.516             | 0.008546 |
| IFI44L         | Homo sapiens interferon-induced protein 44-like                                                     | 0.613             | 0.003454 |
| MYH11          | Homo sapiens myosin, heavy chain 11, smooth muscle, transcript variant SM1A                         | 1.737             | 0.035925 |
| IFI44          | Homo sapiens interferon-induced protein 44                                                          | 0.651             | 0.008281 |
| SC4MOL         | Homo sapiens sterol-C4-methyl oxidase-like, transcript variant 1                                    | 0.730             | 0.030646 |
| MMP9           | Homo sapiens matrix metalloproteinase 9 (gelatinase B, 92kDa gelatinase, 92kDa type IV collagenase) | 0.444             | 0.041349 |
| CRYAB          | Homo sapiens crystallin, alpha B                                                                    | 1.577             | 0.019085 |
| CCL3           | Homo sapiens chemokine (C-C motif) ligand 3                                                         | 0.559             | 0.020373 |
| HSPA1A         | Homo sapiens heat shock 70kDa protein 1A                                                            | 1.462             | 0.020599 |
| CCL3L3         | Homo sapiens chemokine (C-C motif) ligand 3-like 3                                                  | 0.555             | 0.025479 |
| DNAJB1         | Homo sapiens DnaJ (Hsp40) homolog, subfamily B, member 1                                            | 1.744             | 0.008507 |
| HSPA1B         | Homo sapiens heat shock 70kDa protein 1B                                                            | 1.919             | 0.028644 |

## NL4.3, 24 h post-challenge

| Gene      | Definition                                                                                                                                                       | Virus vs. Ctrl FC | P value  |
|-----------|------------------------------------------------------------------------------------------------------------------------------------------------------------------|-------------------|----------|
| VAMP5     | Homo sapiens vesicle-associated membrane protein 5 (myobrevin)                                                                                                   | 1.533             | 0.019543 |
| HMGCR     | Homo sapiens 3-hydroxy-3-methylglutaryl-Coenzyme A reductase (                                                                                                   | 0.670             | 0.049481 |
| BATF2     | Homo sapiens basic leucine zipper transcription factor, ATF-like 2                                                                                               | 1.527             | 0.015232 |
| HMGCS1    | Homo sapiens 3-hydroxy-3-methylglutaryl-Coenzyme A synthase 1 (soluble) transcript variant 2                                                                     | 0.647             | 0.010298 |
| UBD       | Homo sapiens ubiquitin D                                                                                                                                         | 1.910             | 0.000363 |
| AGR3      | Homo sapiens anterior gradient homolog 3 (Xenopus laevis)                                                                                                        | 0.624             | 0.031084 |
| PRRX1     | Homo sapiens paired related homeobox 1, transcript variant pmx-1a                                                                                                | 0.740             | 0.006546 |
| LOC400759 | Homo sapiens similar to Interferon-induced guanylate-binding protein 1 (GTP-binding protein 1) (Guanine nucleotide-binding protein 1) (HuGBP-1) on chromosome 1. | 1.672             | 0.000182 |
| IL1B      | Homo sapiens interleukin 1, beta                                                                                                                                 | 0.614             | 0.030705 |
| LOC652493 | PREDICTED: Homo sapiens similar to Ig kappa chain V-I region HK102 precursor                                                                                     | 1.251             | 0.025879 |
| GPRC5A    | Homo sapiens G protein-coupled receptor, family C, group 5, member A                                                                                             | 0.637             | 0.000424 |
| PPARG     | Homo sapiens peroxisome proliferator-activated receptor gamma, transcript variant 1                                                                              | 0.694             | 0.000742 |
| HIGD1A    | Homo sapiens HIG1 domain family, member 1A, transcript variant 1                                                                                                 | 0.624             | 0.032159 |
| KRT17     | Homo sapiens keratin 17                                                                                                                                          | 1.684             | 0.000834 |
| SERPINB2  | Homo sapiens serpin peptidase inhibitor, clade B (ovalbumin), member 2                                                                                           | 0.510             | 0.01197  |
| LRP4      | Homo sapiens low density lipoprotein receptor-related protein 4                                                                                                  | 0.620             | 0.002798 |
| CCL3L1    | Homo sapiens chemokine (C-C motif) ligand 3-like 1                                                                                                               | 0.681             | 0.025654 |
| CTSG      | Homo sapiens cathepsin G                                                                                                                                         | 1.413             | 0.005265 |
| IL1RN     | Homo sapiens interleukin 1 receptor antagonist, transcript variant 4                                                                                             | 0.863             | 0.044819 |
| CD36      | Homo sapiens CD36 molecule (thrombospondin receptor), transcript variant 3                                                                                       | 1.072             | 0.036037 |
| TMEM173   | Homo sapiens transmembrane protein 173                                                                                                                           | 1.583             | 0.000012 |
| ATAD4     | Homo sapiens ATPase family, AAA domain containing 4                                                                                                              | 0.612             | 0.008077 |
| HOXA3     | Homo sapiens homeobox A3, transcript variant 2                                                                                                                   | 1.322             | 0.021947 |
| IDS       | Homo sapiens iduronate 2-sulfatase (Hunter syndrome), transcript variant 2,                                                                                      | 1.519             | 0.000307 |
| LMBRD1    | Homo sapiens LMBR1 domain containing 1                                                                                                                           | 0.621             | 0.030836 |
| BMP2      | Homo sapiens bone morphogenetic protein 2                                                                                                                        | 0.662             | 0.044677 |
| SC4MOL    | Homo sapiens sterol-C4-methyl oxidase-like, transcript variant 1                                                                                                 | 0.606             | 0.013694 |
| CCL3      | Homo sapiens chemokine (C-C motif) ligand 3                                                                                                                      | 0.717             | 0.001042 |
| BMP7      | Homo sapiens bone morphogenetic protein 7 (osteogenic protein 1)                                                                                                 | 1.529             | 0.002284 |
| CCL3L3    | Homo sapiens chemokine (C-C motif) ligand 3-like 3                                                                                                               | 0.674             | 0.000129 |
| DNAJB1    | Homo sapiens DnaJ (Hsp40) homolog, subfamily B, member 1                                                                                                         | 1.487             | 0.032428 |
| VAMP5     | Homo sapiens vesicle-associated membrane protein 5 (myobrevin)                                                                                                   | 1.533             | 0.019543 |

<sup>1</sup>Significantly modulated genes as determined by unpaired *t* test with a Benjamini-Hochberg multiple testing correction ( $P < 0.05$ )

FC: Fold change
