# Supplementary material for: Early Colorectal Responses to HIV-1 and Modulation by Antiretroviral Drugs
Source: MDPI journal article supplement (doi:10.3390/vaccines9030231), 2021-03-08
Supplement: s1 [file s1]

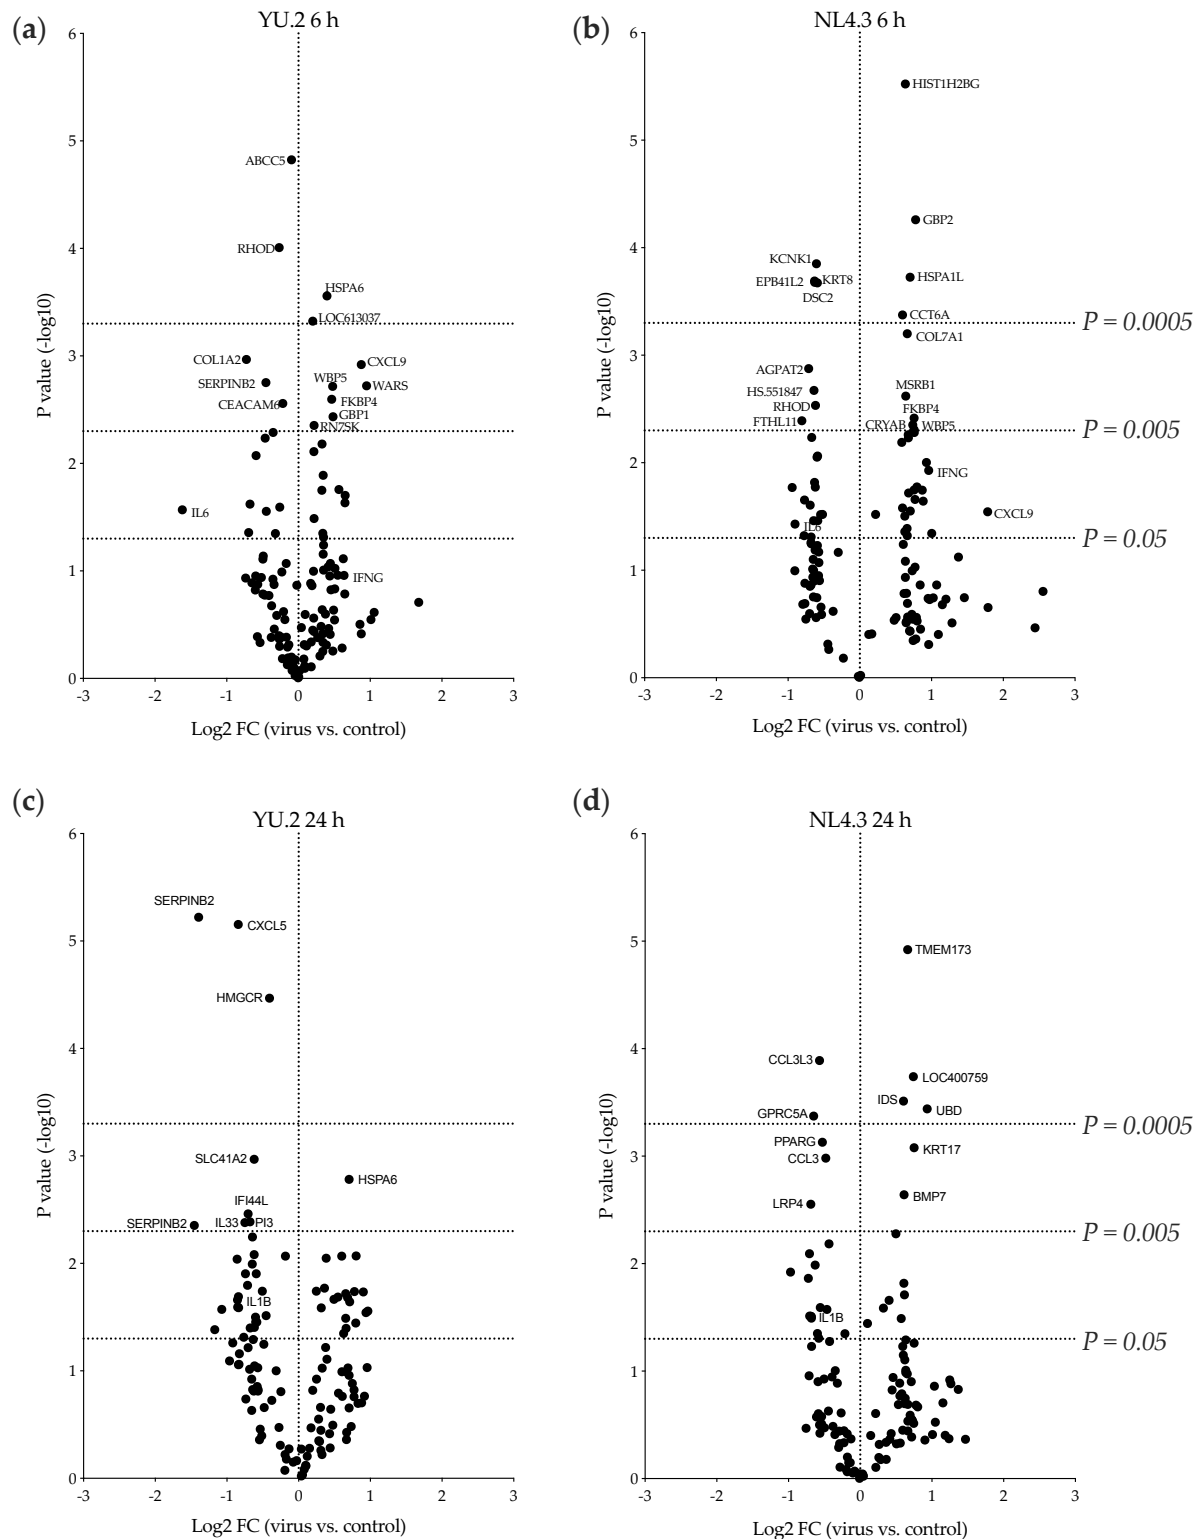

**Figure S5.** Modulation of colorectal transcriptomic profile induced by exposure to HIV-1. Volcano plots of all genes detected by RNA microarray after 6 (a, b) or 24 h (c, d) of culture and comparing colorectal explants exposed to YU.2 (a, c) or NL4.3 (b, d) to those unchallenged (control). FC: fold change. Vertical dotted line is set at a Log<sub>2</sub>FC = 0. Data shown are from two independent experiments performed with tissue from different donors. Full list of statistically modulated genes can be found in Table S2.
