# Supplementary material for: Early Colorectal Responses to HIV-1 and Modulation by Antiretroviral Drugs
Source: MDPI journal article supplement (doi:10.3390/vaccines9030231), 2021-03-08
Supplement: s1 [file s1]

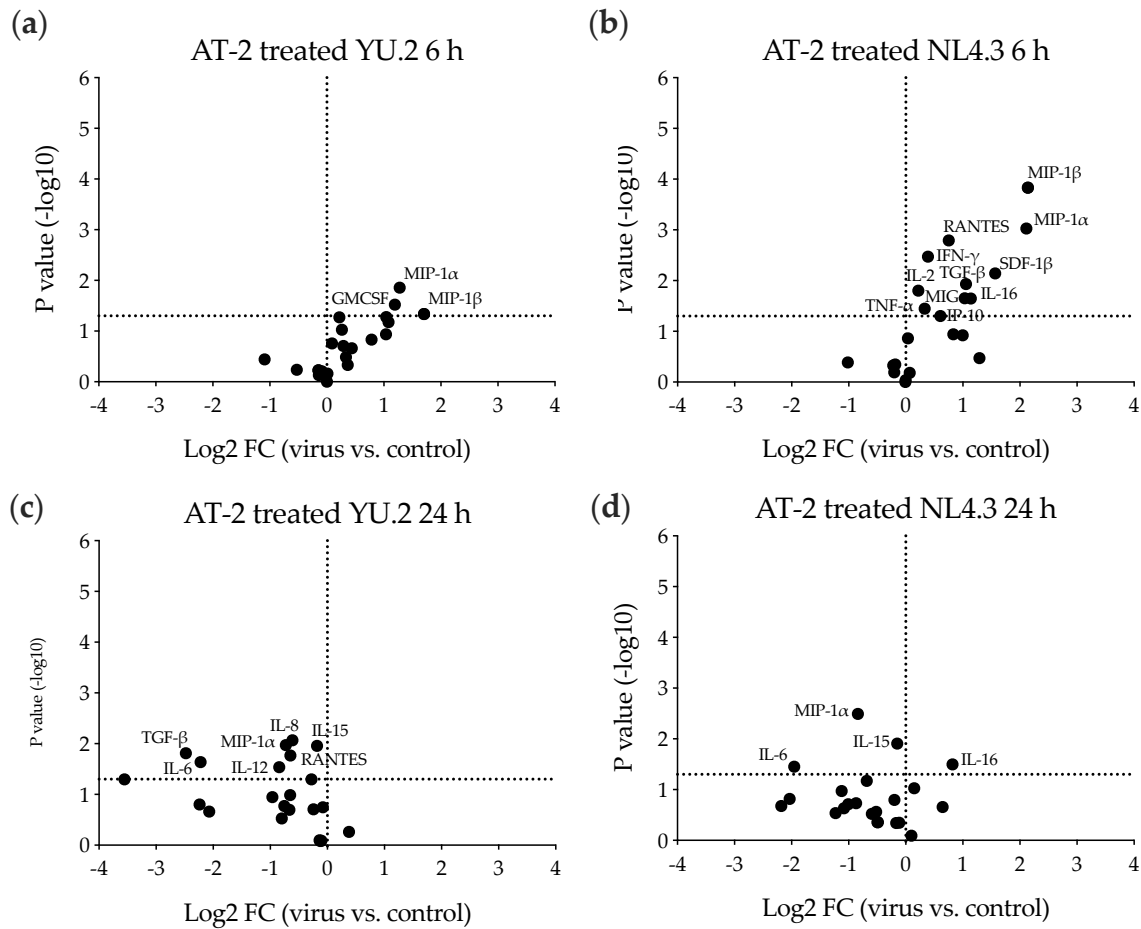

**Figure S4.** Modulation of colorectal cytokine profile induced by exposure to HIV-1. Volcano plots of all cytokines measured after 6 (a, b) or 24 h (c, d) of culture and comparing colorectal explants exposed to YU.2 (a, c) or NL4.3 (b, d) to those unchallenged (control). FC: fold change. Horizontal dotted line indicates a  $P$  value of 0.05. Analytes above this line are significantly modulated. Vertical dotted line is set at a  $\text{Log}_2\text{FC} = 0$ . Data shown are from quadruplicates with tissue from one donor.
